# Supplementary material for: A laboratory-scale continuous flow chlorine generator for organic synthesis
Source: Royal Society of Chemistry journal article supplement (doi:10.1039/c6re00135a), 2016-01-01

## Electronic Supplementary Information

# A Laboratory-Scale Continuous Flow Chlorine Generator for Organic Synthesis

Franz J. Strauss,<sup>a</sup> David Cantillo\*<sup>a,b</sup> Javier Guerra<sup>c</sup> and C. Oliver Kappe\*<sup>a,b</sup>

<sup>a</sup> *Institute of Chemistry, University of Graz, Heinrichstrasse 28, 8010, Graz, Austria. E-mail:  
david.cantillo@uni-graz.at, oliver.kappe@uni-graz.at*

<sup>b</sup> *Research Center Pharmaceutical Engineering GmbH (RCPE), Inffeldgasse 13, 8010 Graz, Austria*

<sup>c</sup> *Crystal Pharma, Gadea Pharmaceutical Group, a division of AMRI, Parque Tecnológico de Boecillo,  
Valladolid, Spain*

### Contents:

|                                                                                                                                          |        |
|------------------------------------------------------------------------------------------------------------------------------------------|--------|
| General Remarks .....                                                                                                                    | S2     |
| Experimental Procedures and Characterization Data .....                                                                                  | S2-S6  |
| Table S1. Preliminary batch experiments for the selective oxidation of<br>secondary alcohols using the Cl <sub>2</sub> -Py complex ..... | S4     |
| Table S2. Optimization of continuous flow photochlorination .....                                                                        | S6     |
| NMR Spectra for all Isolated Compounds .....                                                                                             | S7-S11 |

**General remarks.**  $^1\text{H-NMR}$  spectra were recorded on a Bruker 300 MHz instrument. Chemical shifts ( $\delta$ ) are expressed in ppm downfield from TMS as internal standard. The letters s, d, t, q, and m are used to indicate singlet, doublet, triplet, quadruplet, and multiplet. Analytical HPLC analysis was carried out on a C18 reversed-phase (RP) analytical column ( $150 \times 4.6$  mm, particle size 5 mm) at  $25^\circ\text{C}$  using a mobile phase A (water/acetonitrile 90:10 (v/v) + 0.1% TFA) and B (MeCN + 0.1% TFA) at a flow rate of  $1.0\text{ mL min}^{-1}$ . The following gradient was applied: linear increase from solution 30% B to 100% B in 8 min, hold at 100% solution B for 2 min. GC/MS (FOCUS-GC/DSQ II MS, ThermoFisher) monitoring was based on electron impact ionization (70 eV) using a HP/5MS column ( $30\text{ m} \times 0.250\text{ mm} \times 0.025\text{ }\mu\text{m}$ ). After 1 min at  $50^\circ\text{C}$  the temperature was increased in  $25^\circ\text{C min}^{-1}$  steps up to  $300^\circ\text{C}$  and kept at  $300^\circ\text{C}$  for 1 min. The carrier gas was helium and the flow rate  $1.0\text{ mL min}^{-1}$  in constant-flow mode. GC-FID analysis was performed on a standard GC instrument with a flame ionization detector, using an HP5 column ( $30\text{ m}, 0.250\text{ mm}, 0.025\text{ }\mu\text{m}$ ). After 1 min at  $50^\circ\text{C}$  the temperature was increased in  $25^\circ\text{C min}^{-1}$  steps up to  $300^\circ\text{C}$  and kept at  $300^\circ\text{C}$  for 4 min. The detector gas for the flame ionization was  $\text{H}_2$  and compressed air (5.0 quality). Flash chromatography purifications were carried out on an automated flash chromatography system using cartridges packed with KP-SIL,  $60\text{ }\text{\AA}$  ( $32\text{--}63\text{ }\mu\text{m}$  particle size). All solvents and chemicals were obtained from standard commercial vendors and were used without any further purification. 1.5 M NaOCl solutions were prepared by diluting commercial NaOCl 12%Cl (purchased from Carl Roth GmbH) with distilled water. All prepared NaOCl solutions were titrated using the standard KI/ $\text{Na}_2\text{S}_2\text{O}_4$  procedure to determine their exact concentration prior use.

**Experimental procedure for the generation, extraction, and separation of chlorine and its quantification by titration (cf. Table 1).**

The flow setup (Figure S1) consisted of three separate feeds (Feed A, Feed B, and Feed C). The reagents were introduced in the flow reactor using peristaltic pumps from Vapourtec (E-series). Feed A consisted of a 1.5 M solution of sodium hypochlorite in water. Feed B consisted of 6 M HCl in water. Feed C consisted of the corresponding organic solvent. Solutions A and B were mixed using a PEEK cross-assembly (0.5 mm i.d.) before entering a PFA tubing (0.8 mm i.d., 100  $\mu\text{L}$ ) where the chlorine was rapidly generated (gas evolution could be visually observed). The combined streams A and B were mixed with C using a second PEEK cross-assembly (0.5 mm i.d.) before entering a residence time unit (PFA tubing, 0.8 mm i.d., 800  $\mu\text{L}$ ). The biphasic mixture then entered a liquid-liquid membrane separator (Zaiput, 1.0  $\mu\text{m}$  pore-size membrane). The aqueous phase was collected in a flask containing a saturated  $\text{Na}_2\text{S}_2\text{O}_4$  solution. When the system was stable the organic phase was collected, under

stirring, in a flask containing 1 g KI and 1 mL H<sub>2</sub>SO<sub>4</sub> (conc) in 50 mL water. The water solution turned brown rapidly due to the formation of I<sub>2</sub>. After 10 min (corresponding to a theoretical amount of 1.5 mmol of Cl<sub>2</sub>) the resulting solution was titrated with a standard 0.2 M Na<sub>2</sub>S<sub>2</sub>O<sub>4</sub> solution using standard procedures.

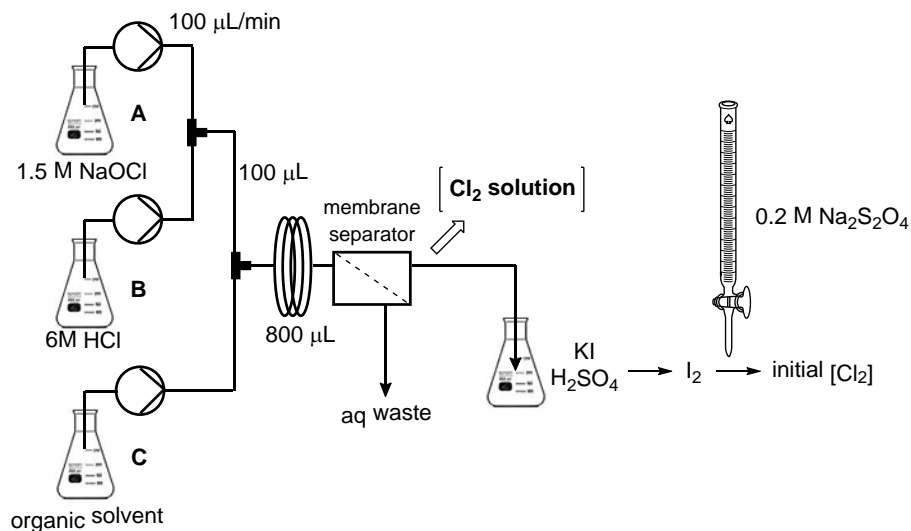

**Figure S1.** Continuous flow setup for the generation, extraction, and separation of chlorine and determination of the process yield by titration using the KI/Na<sub>2</sub>S<sub>2</sub>O<sub>4</sub> system.

### Continuous flow setup and general procedure for the preparation of chlorosilanes under continuous flow conditions

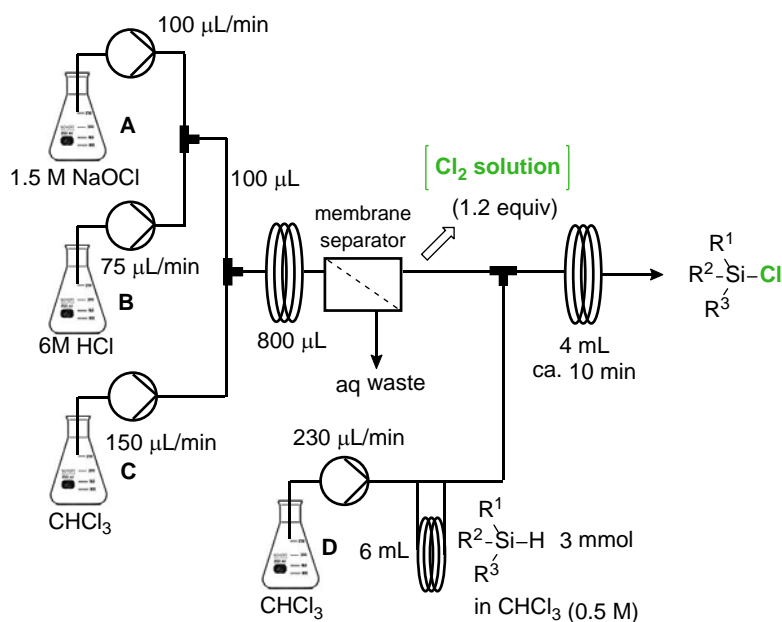

The same setup as for the generation, extraction, and separation of Cl<sub>2</sub> described above was used. The organic phase output of the liquid-liquid membrane separator was connected to Feed D using a Y-

mixer (0.5 i.d.), which consisted of 6 mL a 0.5 M solution of the corresponding silane in  $\text{CHCl}_3$ . Feed D was introduced using a sample loop when the system was stable. After a residence time of 10 min at rt, the reaction mixture was collected in a round-bottomed flask and immediately evaporated under reduced pressure, yielding the pure chlorosilanes.

**Triisopropylsilylchloride (2a)** (561 mg, 99,8%);  $^1\text{H}$  NMR (300 MHz,  $\text{CDCl}_3$ )  $\delta$  1.25 (m, 3H), 1.12 (d,  $J = 6.6$  Hz, 18H);  $^{13}\text{C}$  NMR (75 MHz,  $\text{CDCl}_3$ )  $\delta$  17.7, 13.7.

**Triphenylsilylchloride (2c)** (880 mg, 96%);  $^1\text{H}$  NMR (300 MHz,  $\text{CDCl}_3$ )  $\delta$  7.69 (d,  $J = 6.4$  Hz, 6H), 7.49 (dd,  $J = 14.3, 7.2$  Hz, 9H);  $^{13}\text{C}$  NMR (75 MHz,  $\text{CDCl}_3$ )  $\delta$  135.2, 132.9, 130.8, 128.1.

### Preliminary batch experiments for the selective oxidation of secondary alcohols using the chlorine-pyridine complex

For the preliminary batch experiments the continuous flow setup for the generation/extraction/separation of chlorine as described above was used. The organic phase output from the liquid-liquid membrane separator was collected under stirring in a 10 mL vial containing 1,2-hexanediol (0.5 mmol) and pyridine in chloroform at room temperature.

**Table S1.** Preliminary batch experiments for the selective oxidation of secondary alcohols using the  $\text{Cl}_2$ -Py complex.<sup>a</sup>

| Entry | Pyridine (equiv) | Substrate conc. (M) | $\text{Cl}_2$ (equiv) | Time (min) | Conv (%) <sup>b</sup> | Select (%) <sup>b</sup> |
|-------|------------------|---------------------|-----------------------|------------|-----------------------|-------------------------|
| 1     | 1                | 0.5                 | 1.20                  | 10         | -                     | -                       |
| 2     | 2                | 0.5                 | 1.20                  | 20         | 70                    | 60                      |
| 3     | 3                | 0.5                 | 1.05                  | 40         | 85                    | 95                      |
| 4     | 3                | 0.5                 | 1.20                  | 20         | 94                    | 95                      |
| 5     | 3                | 0.5                 | 1.30                  | 25         | 91                    | 87                      |
| 6     | 4                | 0.5                 | 1.20                  | 20         | 96                    | 95                      |
| 7     | 4                | 1                   | 1.20                  | 15         | 99                    | 99                      |

<sup>a</sup> Conditions: 10 mL vial with 0.5 mmol substrate and pyridine in  $\text{CHCl}_3$ , rt. <sup>b</sup> Determined by GC-FID.

## General procedure for the selective oxidation of secondary alcohols using the $\text{Cl}_2$ -Py complex under continuous flow conditions

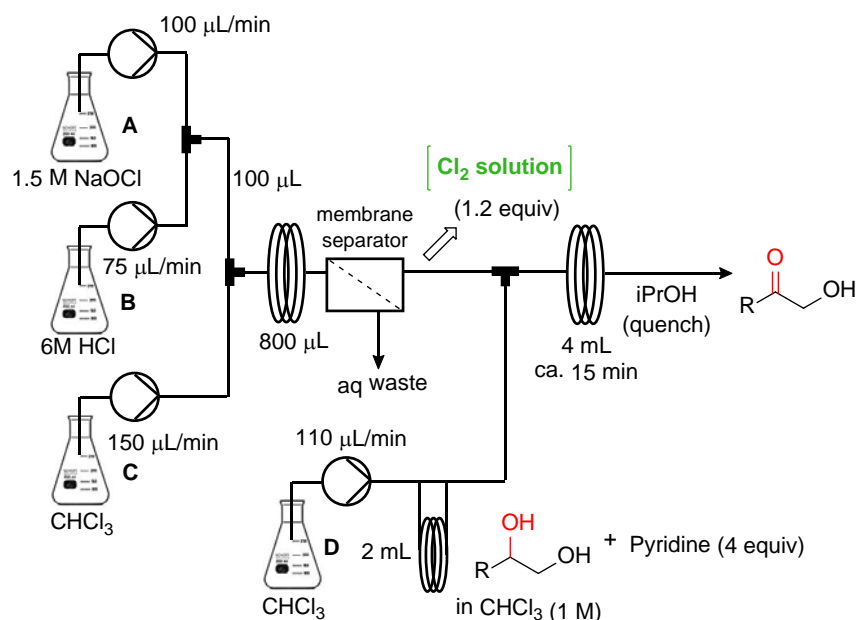

The same setup as for the generation, extraction, and separation of  $\text{Cl}_2$  described above was used. The organic phase output of the liquid-liquid membrane separator was connected to Feed D using a Y-mixer (0.5 i.d.), which consisted of 2 mL of a 1.0 M solution of the diol in  $\text{CHCl}_3$ . Feed D was introduced using a sample loop when the system was stable. After a residence time of ca. 15 min at rt, the reaction mixture was collected in a round-bottomed flask containing an excess of  $i\text{PrOH}$  (quench). Then, the solvent was evaporated and the residue purified by column chromatography.

**1-Hydroxyhexane-2-one (4a).** (368 mg, 53%);  $^1\text{H}$  NMR (300 MHz,  $\text{CDCl}_3$ )  $\delta$  4.27 (s, 2H), 2.43 (t,  $J$  = 7.5 Hz, 2H), 1.74 – 1.53 (m, 2H), 1.35 (m,  $J$  = 14.4, 7.3 Hz, 3H), 0.93 (t,  $J$  = 7.3 Hz, 3H);  $^{13}\text{C}$  NMR (75 MHz,  $\text{CDCl}_3$ )  $\delta$  210.0, 68.0, 38.2, 25.8, 22.3, 13.7; MS (EI)  $m/z$ : 116 (8%), 85 (75%), 57 (100%).

**2-Ethyl-1-hydroxyhexane-3-one (4b).** (376 mg, 44%);  $^1\text{H}$  NMR (300 MHz,  $\text{CDCl}_3$ )  $\delta$  3.87 – 3.62 (m, 2H), 2.64 (ddd,  $J$  = 13.8, 7.1, 4.1 Hz, 1H), 2.48 (t,  $J$  = 7.3 Hz, 2H), 1.74 – 1.46 (m, 4H), 0.93 (td,  $J$  = 7.4, 2.9 Hz, 6H);  $^{13}\text{C}$  NMR (75 MHz,  $\text{CDCl}_3$ )  $\delta$  215.2 (s), 62.4 (s), 54.9 (s), 44.8 (s), 21.3 (s), 16.8 (s), 13.7 (s), 11.8 (s); MS (EI)  $m/z$ : 144 (5%), 126 (2%), 101 (15%), 89 (100%), 71 (74%), 55 (88%).

**2-Hydroxy-1-phenylethanone (4c).** (400 mg, 48%);  $^1\text{H}$  NMR (300 MHz,  $\text{CDCl}_3$ )  $\delta$  8.01 – 7.87 (m, 2H), 7.72 – 7.59 (m, 1H), 7.59 – 7.47 (m, 2H), 4.90 (s, 2H);  $^{13}\text{C}$  NMR (75 MHz,  $\text{CDCl}_3$ )  $\delta$  198.4 (s), 134.3 (s), 133. (s), 129.0 (s), 127.7 (s), 65.5 (s); MS (EI)  $m/z$ : 136 (4%), 105 (100%), 77 (58%).

### General procedure for the continuous flow photochlorination of toluene derivatives

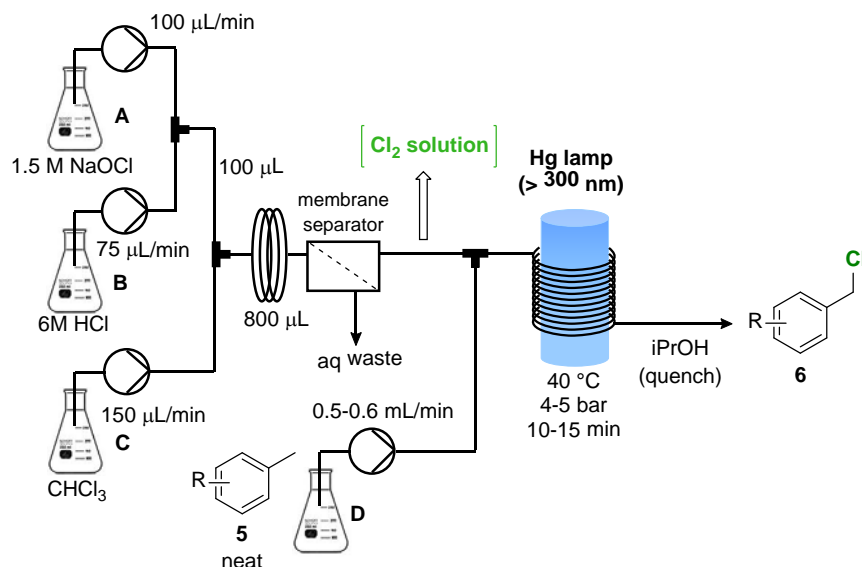

The same setup as for the generation, extraction, and separation of  $\text{Cl}_2$  described above was used. The organic phase output of the liquid-liquid membrane separator was connected to Feed D using a Y-mixer (0.5 i.d.), which contained a stream of the neat toluene derivative. The reaction mixture entered the photoreactor (Vapourtec UV-150, Hg lamp at 50% power -75W-, 300 nm cutoff filter) for which temperature had been set at 40 °C. To avoid a possible expansion of the  $\text{CHCl}_3$  at elevated temperatures, a backpressure regulator adjusted to 4-5 bar was placed at the reactor output. After a residence time of ca. 20 min, the reaction mixture was collected in a round-bottomed flask containing an excess of *i*PrOH (quench). The crude reaction mixture was analyzed by GC-MS and GC-FID using anisole as internal standard (added after quench).

**Table S2.** Optimization of the continuous flow photochlorination of toluene derivatives.

| Entry | Substrate        | Temp (°C) | Irrad. wavelength (nm) | Flow rate (µL/min) <sup>a</sup> | Time (min) | GC Yield (%) <sup>b</sup> | Selectivity (%) <sup>b</sup> |
|-------|------------------|-----------|------------------------|---------------------------------|------------|---------------------------|------------------------------|
| 1     | Toluene          | 40        | No light               | 574                             | 15         | < 1                       | 99                           |
| 2     | Toluene          | 40        | 365 nm                 | 574                             | 15         | 96                        | 99                           |
| 3     | Toluene          | 40        | > 300                  | 574                             | 15         | 99                        | 99                           |
| 4     | Toluene          | 40        | > 300                  | 287                             | 25         | 91                        | 99                           |
| 5     | Toluene          | 60        | > 300                  | 574                             | 15         | 94                        | 99                           |
| 6     | 3-Nitrotoluene   | 40        | > 300                  | 640                             | 15         | 87                        | 99                           |
| 7     | 4-Methylanisol   | 40        | > 300                  | 681                             | 15         | 99                        | 81                           |
| 8     | <i>o</i> -Xylene | 40        | > 300                  | 652                             | 15         | 99                        | 99                           |

<sup>a</sup> The flow rates for the toluene derivatives were modified to keep the ratio toluene/ $\text{Cl}_2$  constant to a value of ca. 50 and have comparable values for the selectivity (as the residence time variation was very small). <sup>b</sup> Determined by GC-FID.

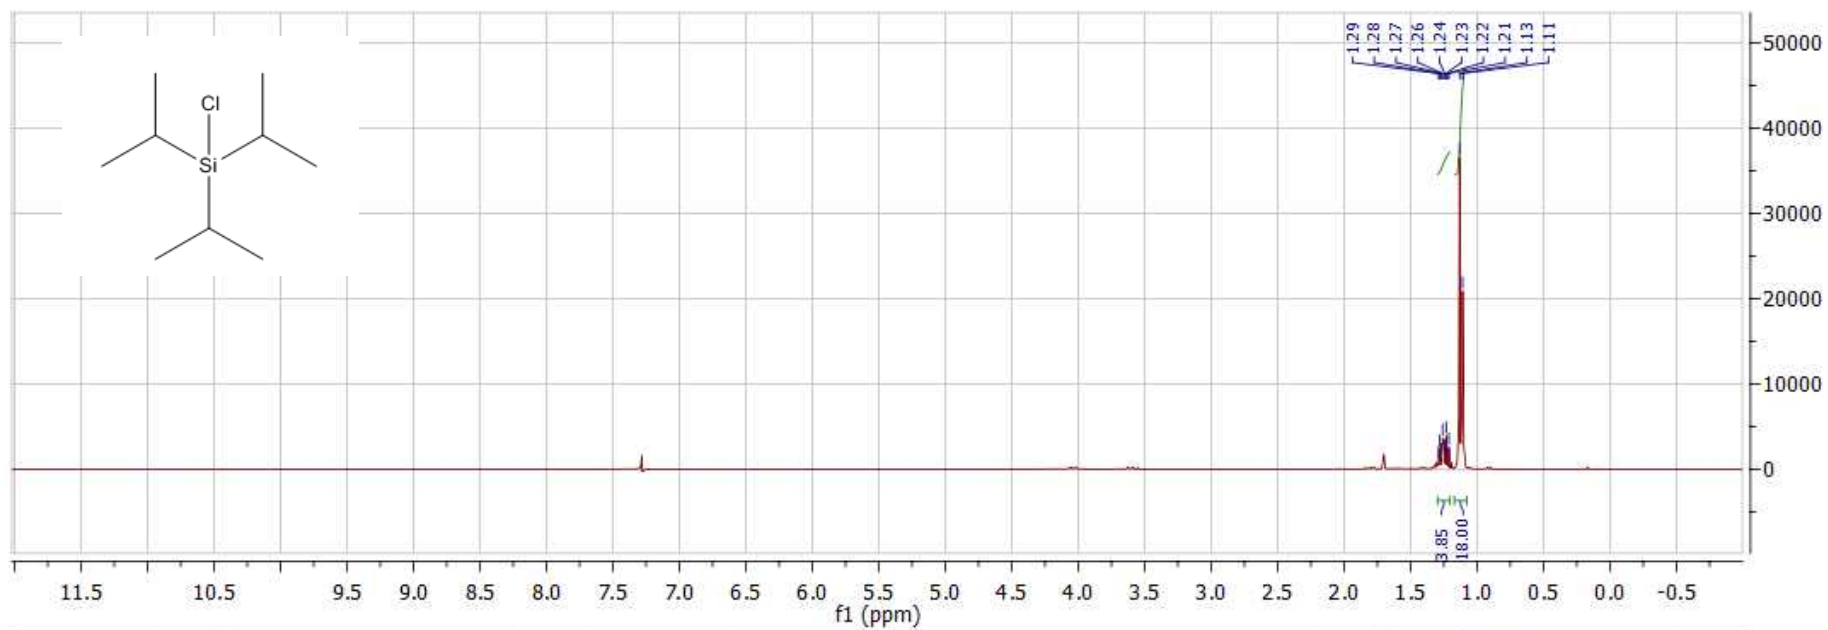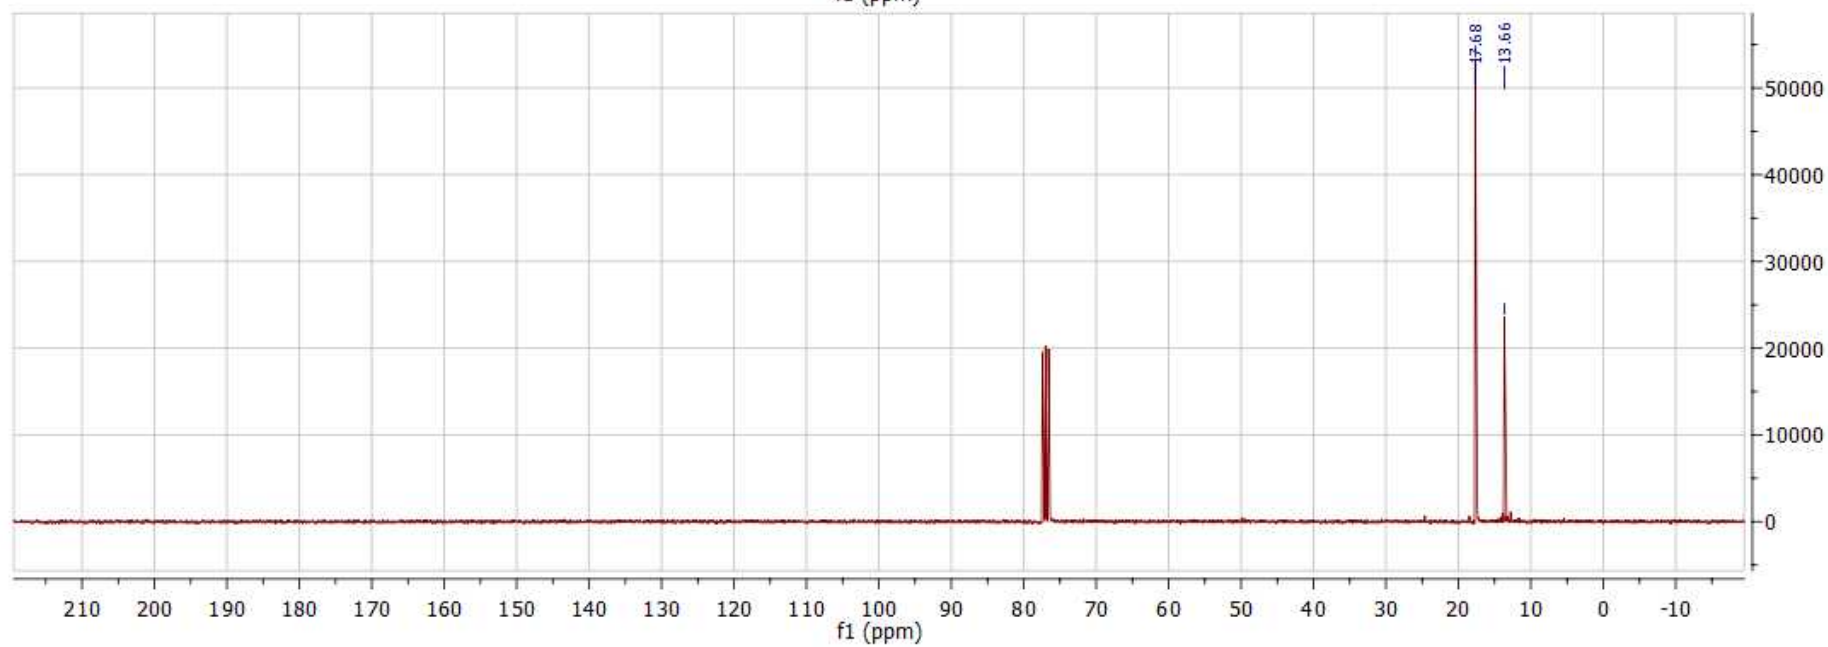

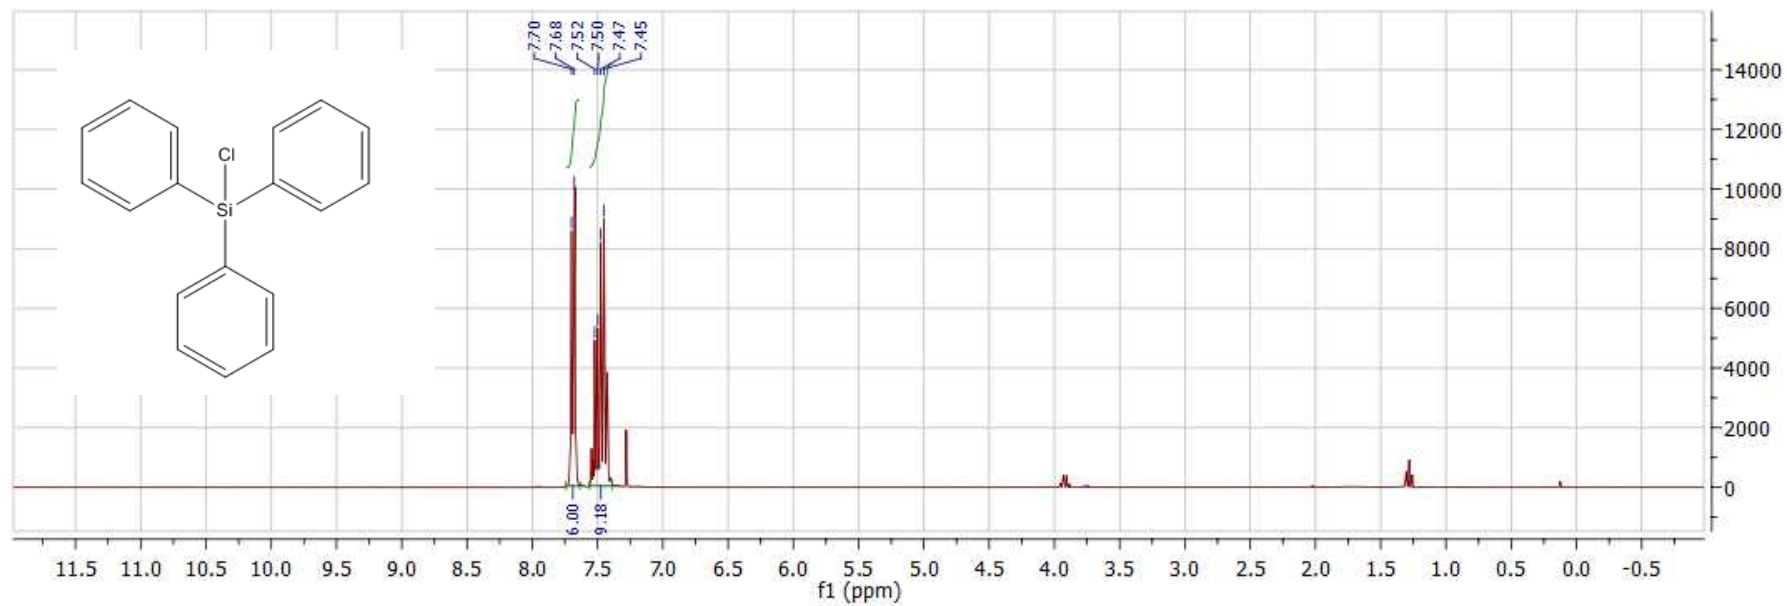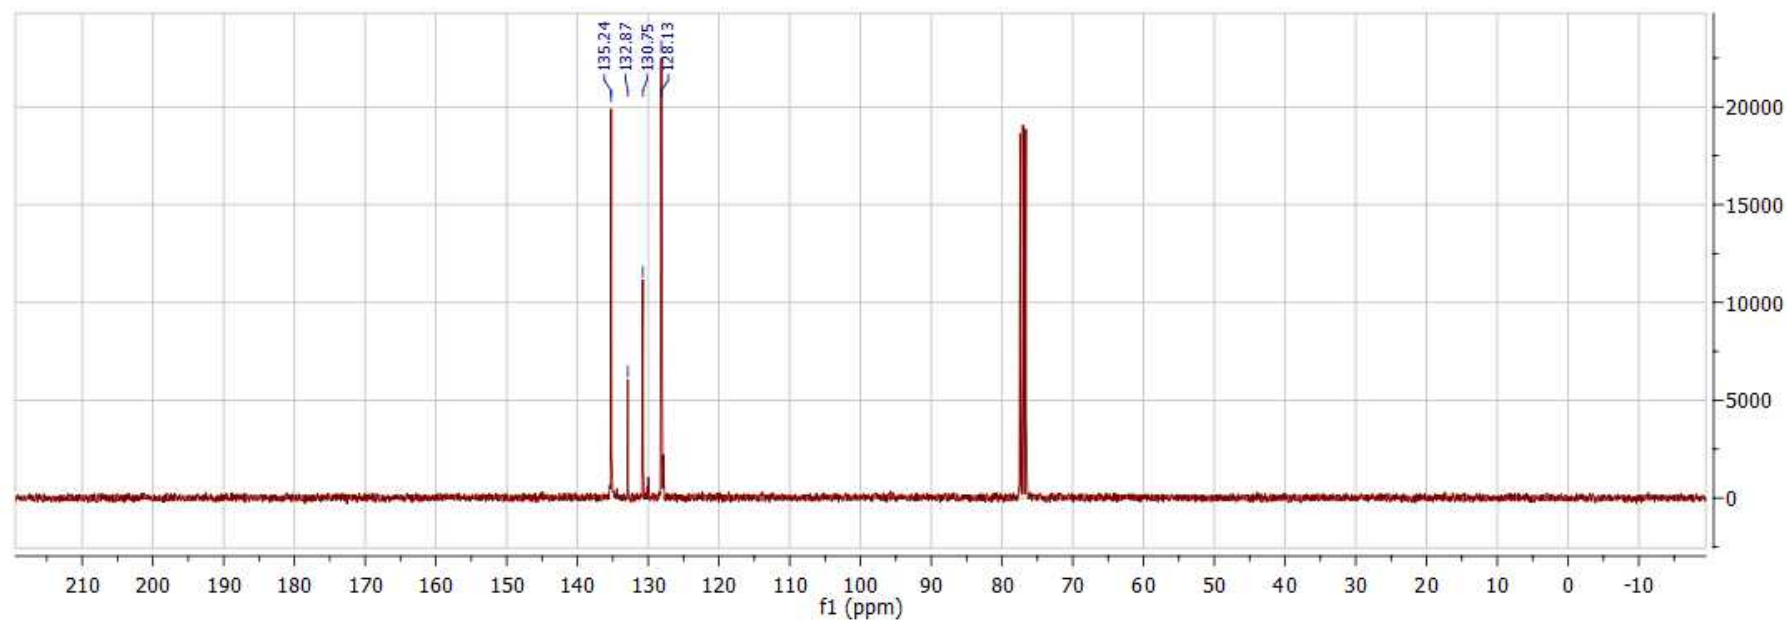



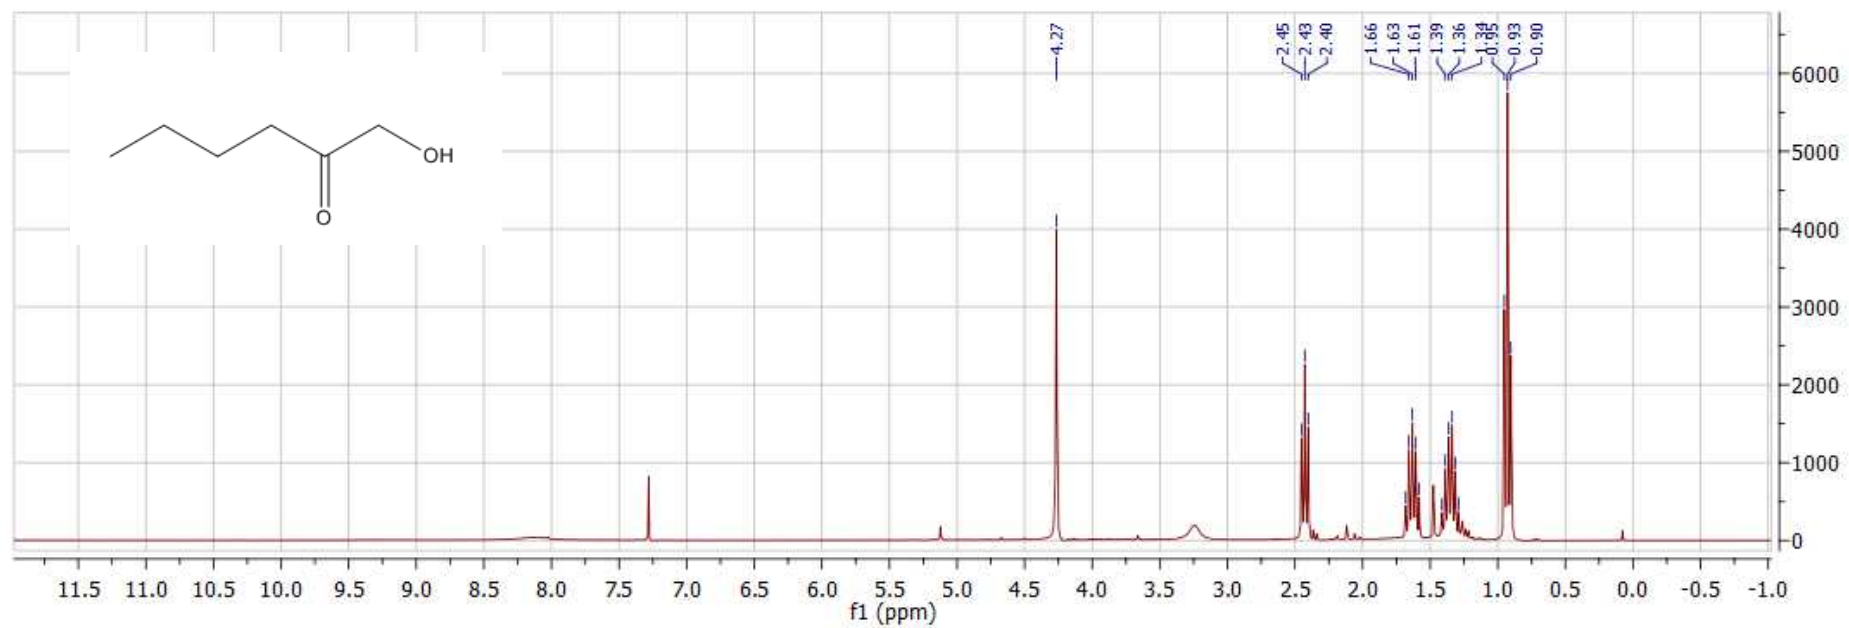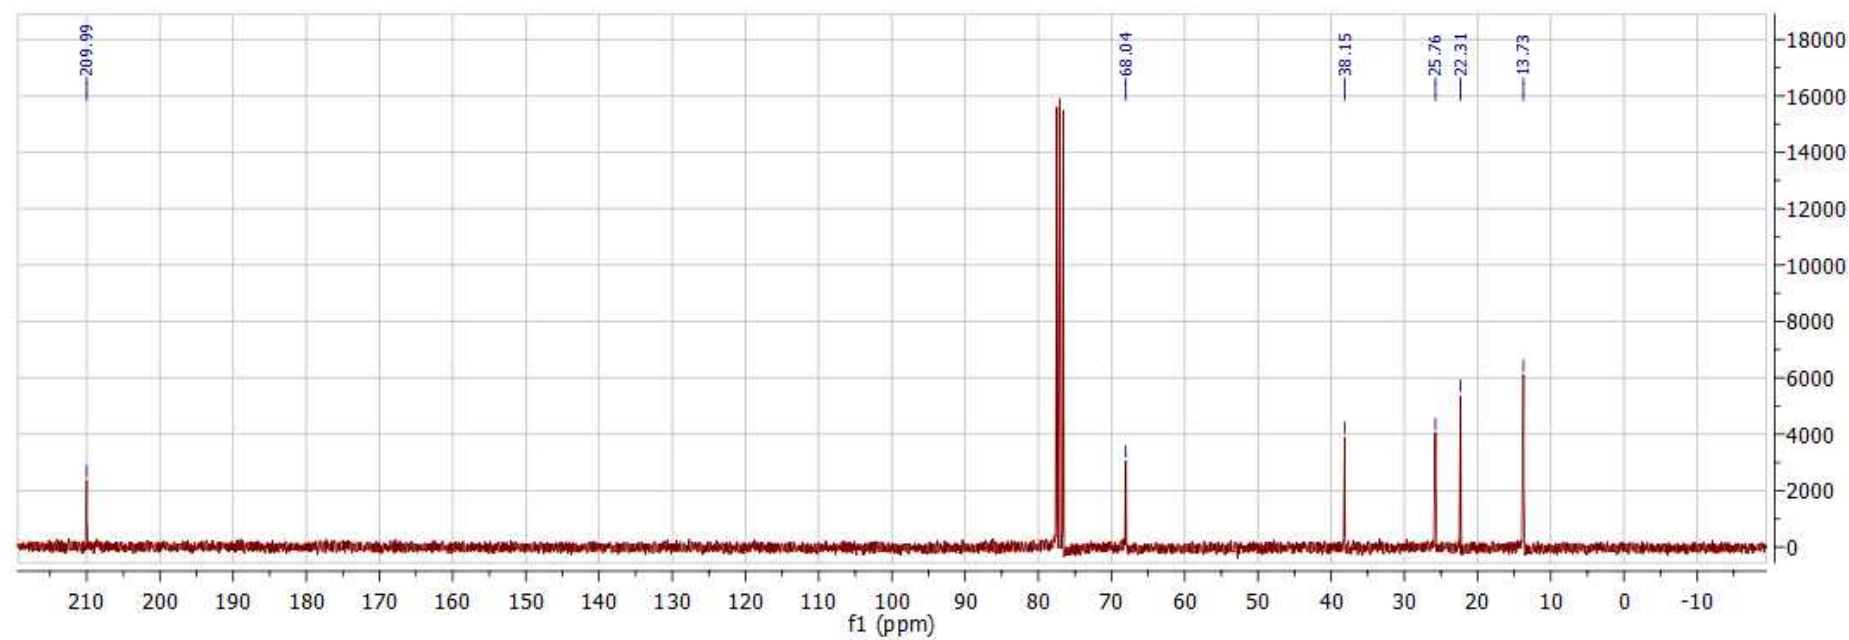

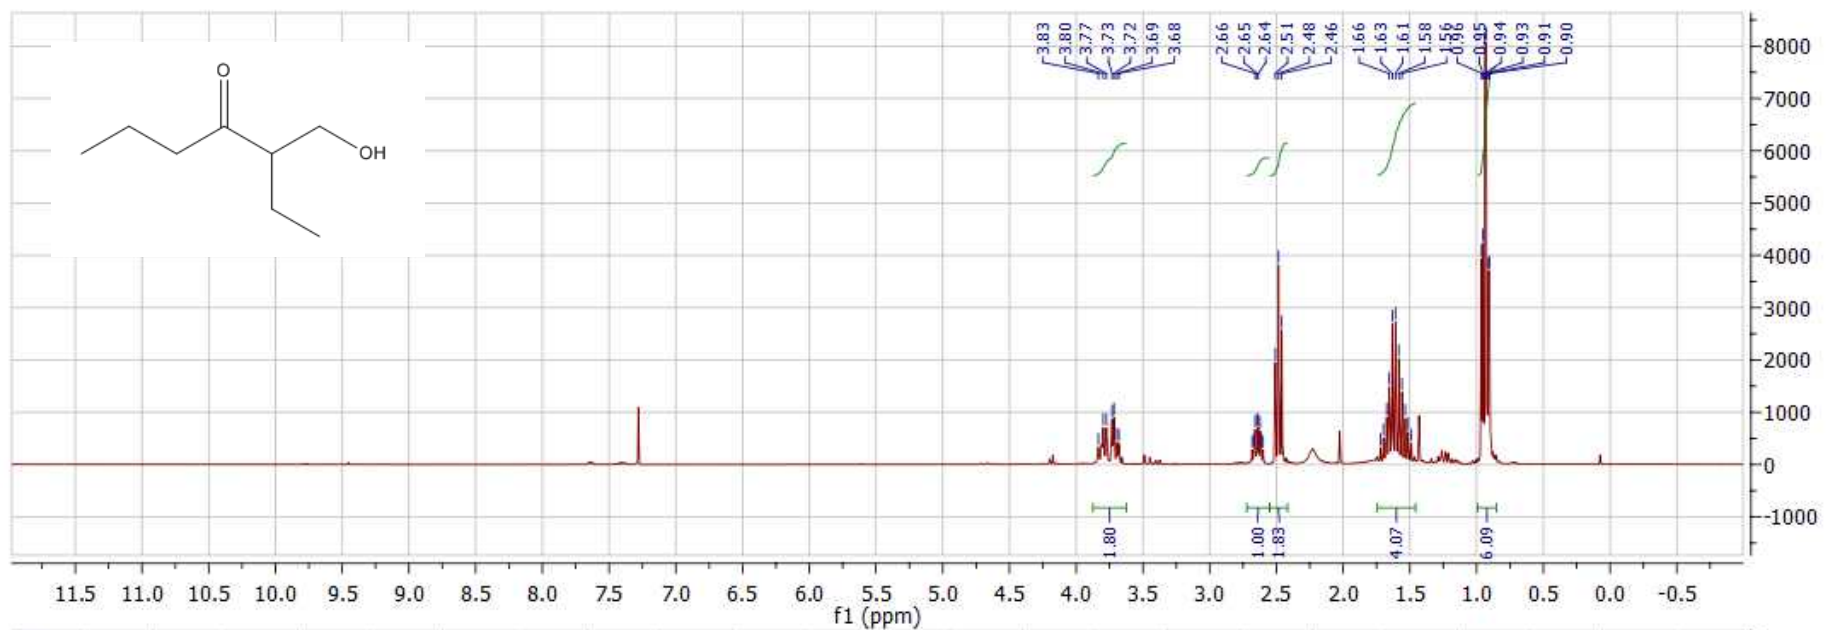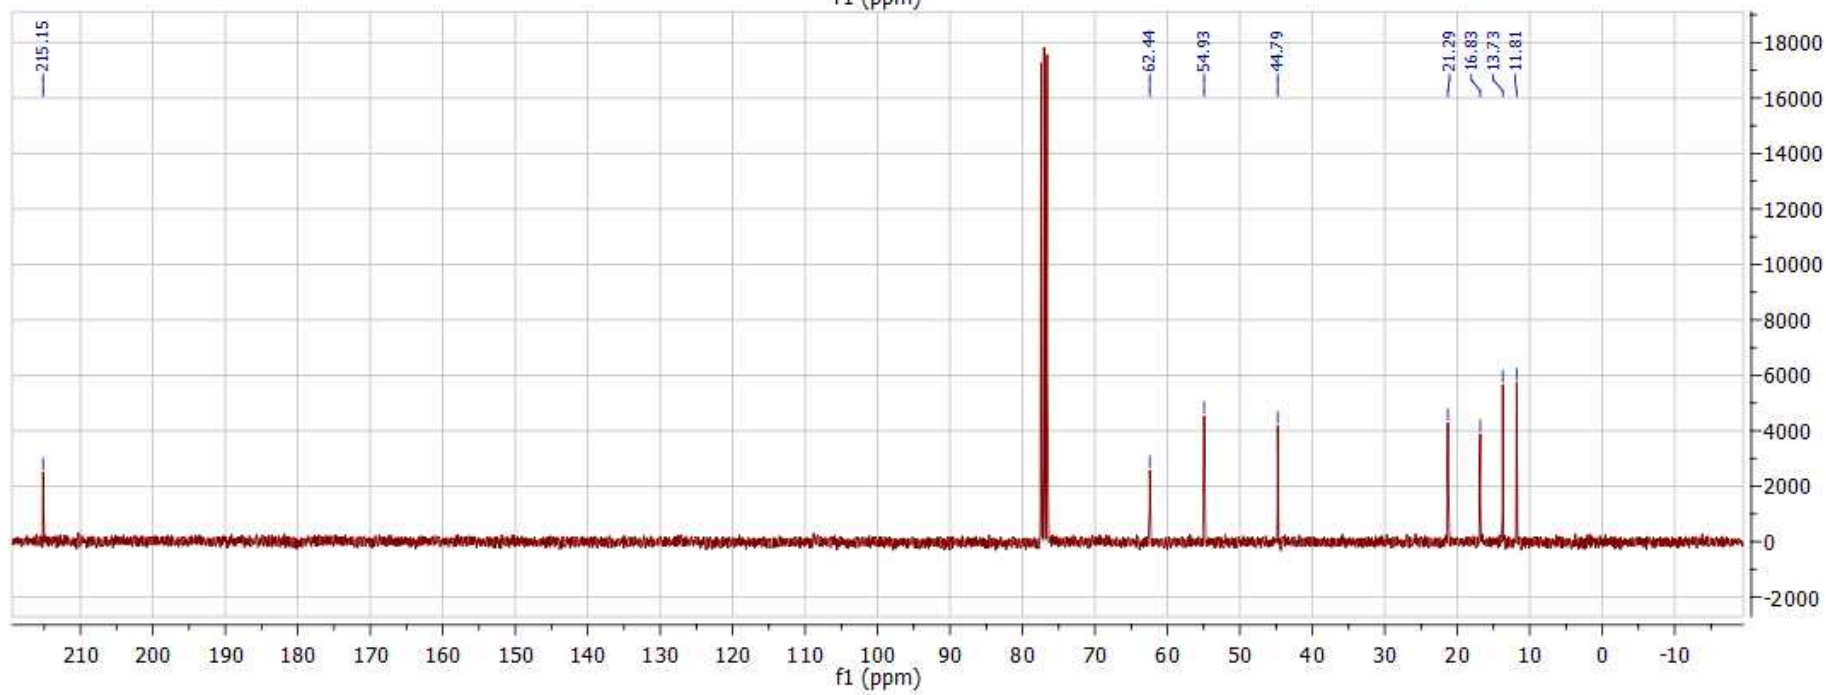

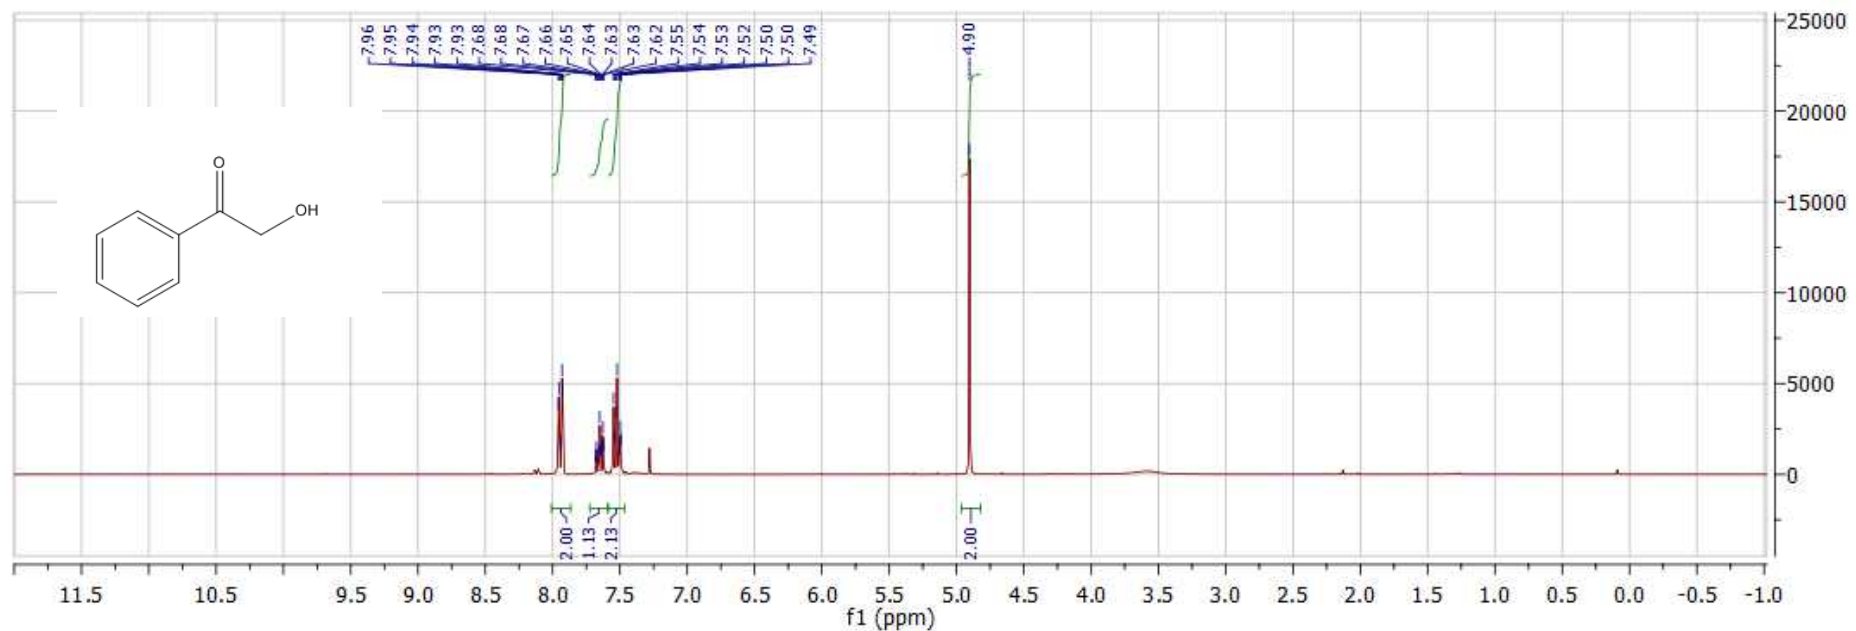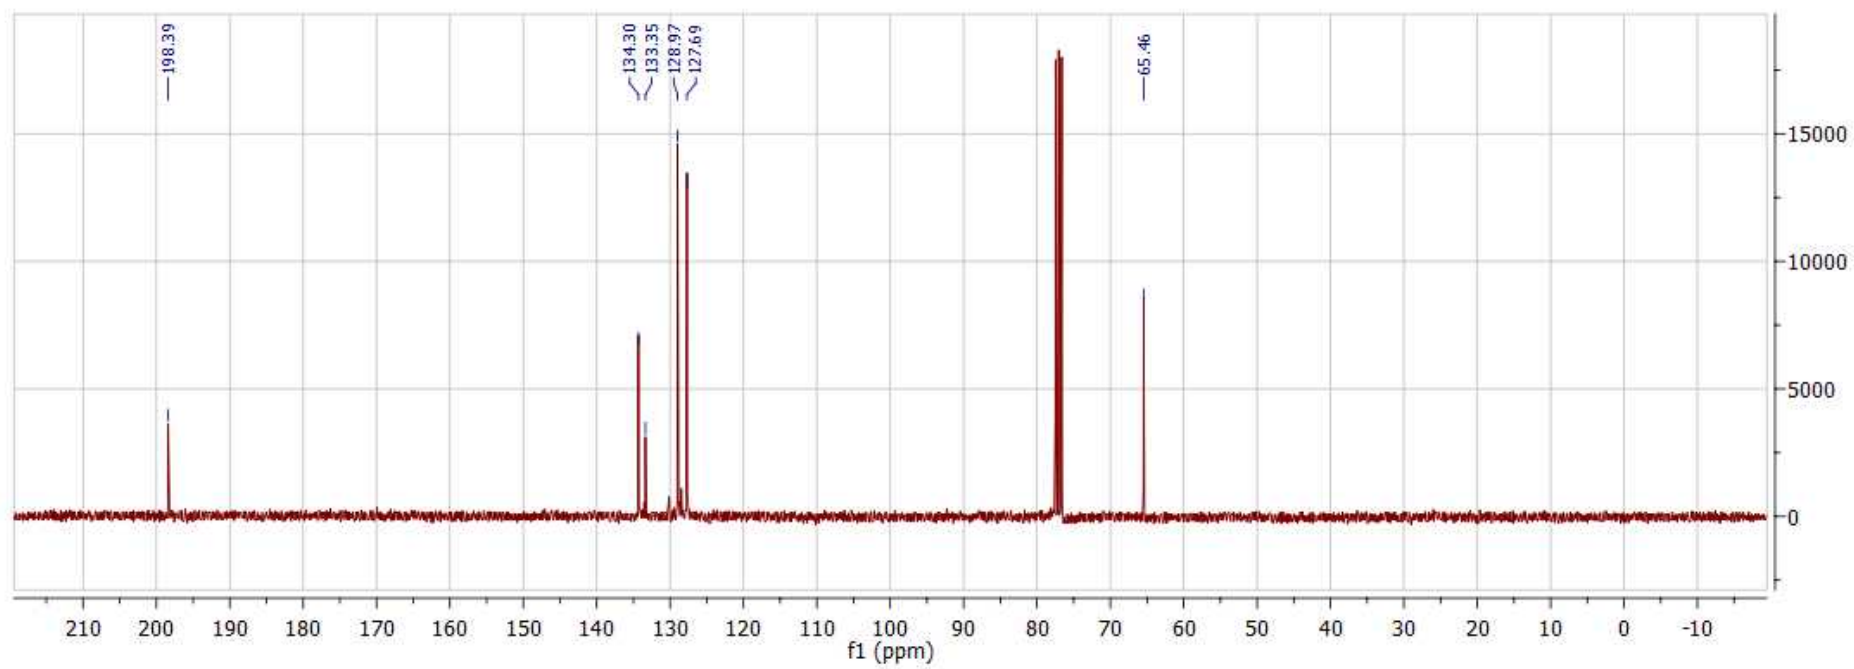

Supplement: c6re00135a1.pdf [file c6re00135a1.pdf]
